# Supplementary material for: Evaluating variation in use of definitive therapy and risk-adjusted prostate cancer mortality in England and the USA
Source: HighWire-hosted journal article supplement (doi:10.1136/bmjopen-2014-006805), 2015-02-01
Supplement: bmjopen-2014-006805supp.pdf [file bmjopen-2014-006805supp.pdf]

**Appendix 1: Sensitivity analysis.** Demographic and disease characteristics of all eligible patients by country (n = 328,182).

|                                  | England       | US             | <i>p</i> value |
|----------------------------------|---------------|----------------|----------------|
|                                  | (n = 97,079)  | (n = 204,910)  |                |
| <b>Year of diagnosis</b>         |               |                |                |
| 2004                             | 18,883 (19.5) | 37,686 (18.4)  | <0.001         |
| 2005                             | 18,392 (19.0) | 35,656 (17.4)  |                |
| 2006                             | 19,847 (20.4) | 41,938 (20.5)  |                |
| 2007                             | 20,061 (20.7) | 45,612 (22.3)  |                |
| 2008                             | 19,896 (20.5) | 44,018 (21.5)  |                |
| <b>Age group</b>                 |               |                |                |
| 35-59                            | 13,593 (14.5) | 57,992 (28.9)  | <0.001         |
| 60-64                            | 16,643 (17.8) | 41,601 (20.7)  |                |
| 65-69                            | 22,782 (24.3) | 44,116 (22.0)  |                |
| 70-74                            | 23,565 (25.1) | 35,612 (17.7)  |                |
| 75-79                            | 17,139 (18.3) | 21,592 (10.8)  |                |
| <b>Ethnicity</b>                 |               |                |                |
| White                            | 68,618 (93.8) | 159,399 (80.4) | <0.001         |
| African/Caribbean                | 2,796 (3.8)   | 29,362 (14.8)  |                |
| Asian                            | 1,343 (1.8)   | 8,983 (4.5)    |                |
| Other                            | 430 (0.6)     | 654 (0.3)      |                |
| Missing                          | 23,892        | 6,512          |                |
| <b>Clinical tumour stage</b>     |               |                |                |
| <i>cT1</i>                       | 10,331 (36.4) | 74,169 (37.0)  | <0.001         |
| <i>cT2</i>                       | 10,779 (38.0) | 109,680 (54.6) |                |
| <i>cT3</i>                       | 6,421 (22.6)  | 15,562 (7.8)   |                |
| <i>cT4</i>                       | 855 (3.0)     | 1,322 (0.7)    |                |
| Missing                          | 68,693        | 4,177          |                |
| <b>Gleason score</b>             |               |                |                |
| 2-6                              | 28,119 (43.4) | 101,123 (50.6) | <0.001         |
| 7                                | 23,527 (36.3) | 76,049 (38.1)  |                |
| 8-10                             | 13,091 (20.2) | 22,570 (11.3)  |                |
| Missing                          | 32,342        | 5,168          |                |
| <b>Use of definitive therapy</b> |               |                |                |
| No definitive therapy            | 63,716 (65.6) | 51,100 (24.9)  | <0.001         |
| Definitive therapy               | 33,363 (34.4) | 153,810 (75.1) |                |

**Appendix 2: Sensitivity analysis.** Relative all-cause mortality (ACM) and prostate cancer mortality (PCM) of all eligible patients according to country (n = 328,182).

|              | <b>6 year All-Cause Mortality (ACM)</b>       |                     | <b>Model 1 (Age at diagnosis, year of diagnosis, ethnicity)</b> |                | <b>Model 2 (Model 1 and definitive therapy)</b> |                |
|--------------|-----------------------------------------------|---------------------|-----------------------------------------------------------------|----------------|-------------------------------------------------|----------------|
|              | <b>US</b>                                     | <b>England</b>      | <b>Adj HR (95% CI)</b>                                          | <b>p value</b> | <b>Adj HR (95% CI)</b>                          | <b>p value</b> |
| All patients | n = 204,910<br>9.6%                           | n = 97,079<br>21.0% | 2.19 (2.13 to 2.26)                                             | <0.001         | 1.55 (1.50 to 1.59)                             | <0.001         |
|              | <b>6 year Prostate Cancer Mortality (PCM)</b> |                     | <b>Model 1 (Age at diagnosis, year of diagnosis, ethnicity)</b> |                | <b>Model 2 (Model 1 and definitive therapy)</b> |                |
|              | <b>US</b>                                     | <b>England</b>      | <b>Adj SHR (95% CI)</b>                                         | <b>p value</b> | <b>Adj SHR (95% CI)</b>                         | <b>p value</b> |
| All patients | 2.6%                                          | 9.6%                | 3.67 (3.50 to 3.85)                                             | <0.001         | 2.37 (2.25 to 2.50)                             | <0.001         |

Adj HR = Adjusted Hazard Ratio, Adj SHR = Adjusted Sub-Hazard Ratio, CI = Confidence interval

**Appendix 3:** Comparison of demographic and disease characteristics of all eligible included and excluded English patients. Patients with either missing clinical tumour stage or missing Gleason score were classified as “excluded patients”.

|                                    | <b>Included patients</b> | <b>Excluded patients</b> | <b>p value</b> |
|------------------------------------|--------------------------|--------------------------|----------------|
|                                    | <b>(n = 25,235)</b>      | <b>(n = 71,844)</b>      |                |
| <b>Year of diagnosis (%)</b>       |                          |                          |                |
| 2004                               | 5,378 (21.3)             | 13,505 (18.8)            | <0.001         |
| 2005                               | 4,959 (19.7)             | 13,433 (18.7)            |                |
| 2006                               | 5,172 (20.5)             | 14,675 (20.4)            |                |
| 2007                               | 5,009 (19.9)             | 15,052 (21.0)            |                |
| 2008                               | 4,717 (18.7)             | 15,179 (21.1)            |                |
| <b>Age group (%)</b>               |                          |                          |                |
| 35-59                              | 3,620 (14.4)             | 9,973 (13.9)             | <0.001         |
| 60-64                              | 4,361 (17.3)             | 12,282 (17.1)            |                |
| 65-69                              | 6,104 (24.2)             | 16,678 (23.2)            |                |
| 70-74                              | 6,145 (24.4)             | 17,420 (24.3)            |                |
| 75-79                              | 5,005 (19.8)             | 15,491 (21.6)            |                |
| <b>Ethnicity (%)</b>               |                          |                          |                |
| White                              | 17,924 (94.8)            | 50,694 (93.4)            | <0.001         |
| African/Caribbean                  | 571 (3.0)                | 2,225 (4.1)              |                |
| Asian                              | 318 (1.7)                | 1,025 (1.9)              |                |
| Other                              | 105 (0.6)                | 325 (0.6)                |                |
| <i>Missing</i>                     | 6,317                    | 17,575                   |                |
| <b>Socio-economic quartile</b>     |                          |                          |                |
| 1                                  | 6,262 (24.9)             | 17,588 (24.5)            | <0.001         |
| 2                                  | 6,101 (24.2)             | 16,975 (23.7)            |                |
| 3                                  | 5,392 (21.4)             | 14,693 (20.5)            |                |
| 4                                  | 4,073 (16.2)             | 12,023 (16.8)            |                |
| 5                                  | 3,363 (13.4)             | 10,409 (14.5)            |                |
| <i>Missing</i>                     | 44                       | 156                      |                |
| <b>Charlson co-morbidity index</b> |                          |                          |                |
| 0                                  | 11,261 (44.6)            | 33,914 (47.2)            | <0.001         |
| 1                                  | 11,761 (46.6)            | 30,861 (43.0)            |                |
| 2 or more                          | 2,213 (8.8)              | 7,069 (9.8)              |                |
| <b>Clinical tumour stage</b>       |                          |                          |                |
| cT1                                | 9,374 (37.2)             | 957 (30.37)              | <0.001         |
| cT2                                | 9,538 (37.8)             | 1,241 (39.4)             |                |
| cT3                                | 5,577 (22.1)             | 844 (26.8)               |                |
| cT4                                | 746 (3.0)                | 109 (3.5)                |                |
| <i>Missing</i>                     | 0                        | 68,693                   |                |
| <b>Gleason score</b>               |                          |                          |                |
| 2-6                                | 10,909 (43.2)            | 17,210 (43.6)            | 0.083          |
| 7                                  | 9,112 (36.1)             | 14,415 (36.5)            |                |
| 8-10                               | 5,214 (20.7)             | 7,877 (19.9)             |                |
| <i>Missing</i>                     | 0                        | 32,342                   |                |
| <b>Treatment (%)</b>               |                          |                          |                |
| No definitive therapy              | 15,583 (61.8)            | 48,133 (67.0)            | <0.001         |
| Definitive therapy                 | 9,652 (38.3)             | 23,711 (33.0)            |                |
